# Supplementary material for: Controlled synthesis of chiral polymers for the kinetic resolution of racemic amino acids
Source: Royal Society of Chemistry journal article supplement (doi:10.1039/c3py01297b), 2013-10-08
Supplement: c3py01297b.pdf [file c3py01297b.pdf]

## Supplementary

# Controlled Synthesis of Chiral Polymers for the Kinetic Resolution of Racemic Amino Acids

Na Li, Heng Wang, Jie Zhang and Xinhua Wan\*

### Supplementary Information

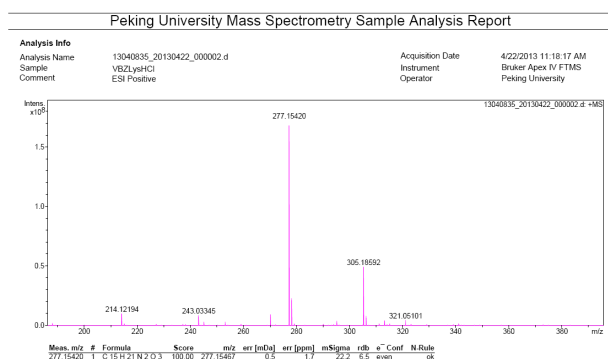

Fig. S1 The mass spectrum of VBZLysHCl obtained by ESI positive.

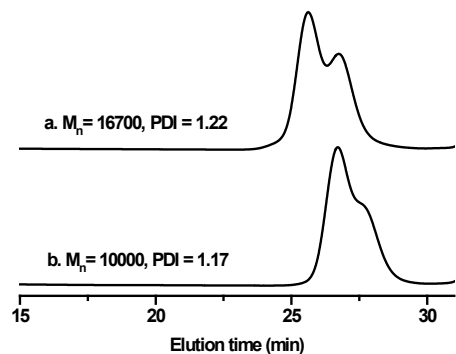

Fig. S2 Evolution of GPC trace of PVBZLysBoc mediated by CDB versus polymerization time, (a) 19h, (b) 12h. Experimental condition:  $[M]/[AIBN]/[CDB] = 200/1/3$ , 0.2 g in 0.2 mL of dioxane, at 70 °C.

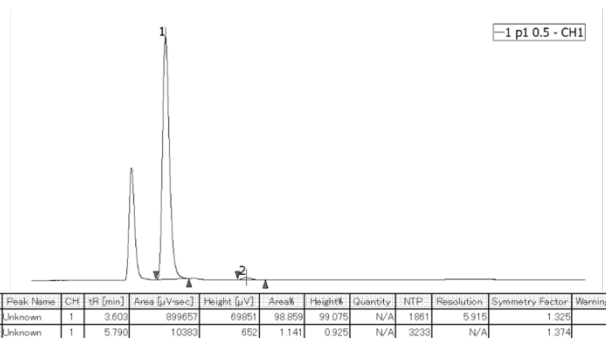

Fig. S3 Evolution of HPLC trace of the crystal Glu·HCl mediated by P1 at a fixed weight concentration of 0.5 wt% mentioned in Table 2. Peak 1 is corresponding to *R*-Glu·HCl, and peak 2 is corresponding to *S*-Glu·HCl.

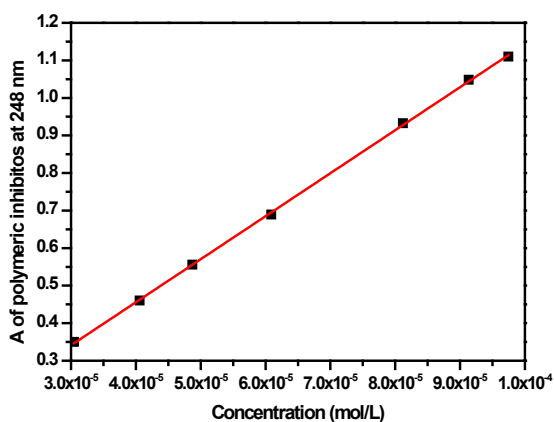

Fig. S4 The absorbance (*A*) of polymeric inhibitors versus concentrations at 248 nm in 5 *M* hydrochloric acid, and the extinction coefficient  $\epsilon_P^{248} = 11400 \text{ L} \cdot \text{mol}^{-1} \cdot \text{cm}^{-1}$ .

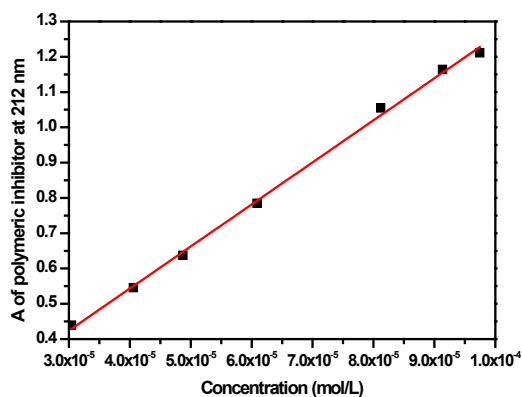

Fig. S5 The absorbance (*A*) of polymeric inhibitors versus concentrations at 212 nm in 5 *M* hydrochloric acid, and the extinction coefficient  $\epsilon_P^{212} = 11900 \text{ L} \cdot \text{mol}^{-1} \cdot \text{cm}^{-1}$ .

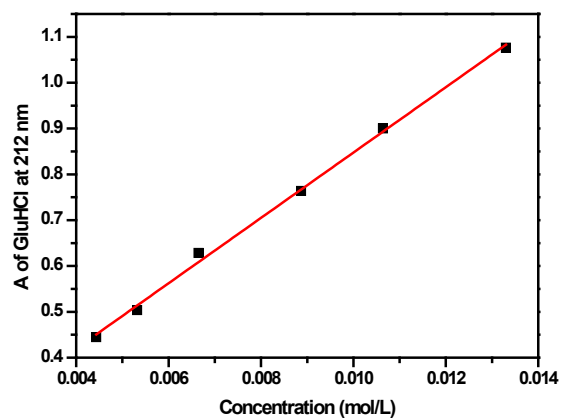

**Fig. S6** The absorbance ( $A$ ) of Glu·HCl *versus* concentrations at 212 nm in 5 M hydrochloric acid, and the extinction coefficient  $\epsilon_G^{212} = 71.3 \text{ L} \cdot \text{mol}^{-1} \cdot \text{cm}^{-1}$ .
